# Supplementary material for: Selecting CMIP6 global climate models (GCMs) for Coordinated Regional Climate Downscaling Experiment (CORDEX) dynamical downscaling over Southeast Asia using a standardised benchmarking framework
Source: Copernicus journal article supplement (doi:10.5194/gmd-17-7285-2024), 2024-10-14
Supplement: Supplementary file 1 [file gmd-17-7285-2024-supplement.pdf]

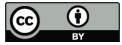

*Supplement of*

## **Selecting CMIP6 global climate models (GCMs) for Coordinated Regional Climate Downscaling Experiment (CORDEX) dynamical downscaling over Southeast Asia using a standardised benchmarking framework**

**Phuong Loan Nguyen et al.**

*Correspondence to:* Phuong Loan Nguyen ([phuongloan.nguyen@unsw.edu.au](mailto:phuongloan.nguyen@unsw.edu.au))

The copyright of individual parts of the supplement might differ from the article licence.

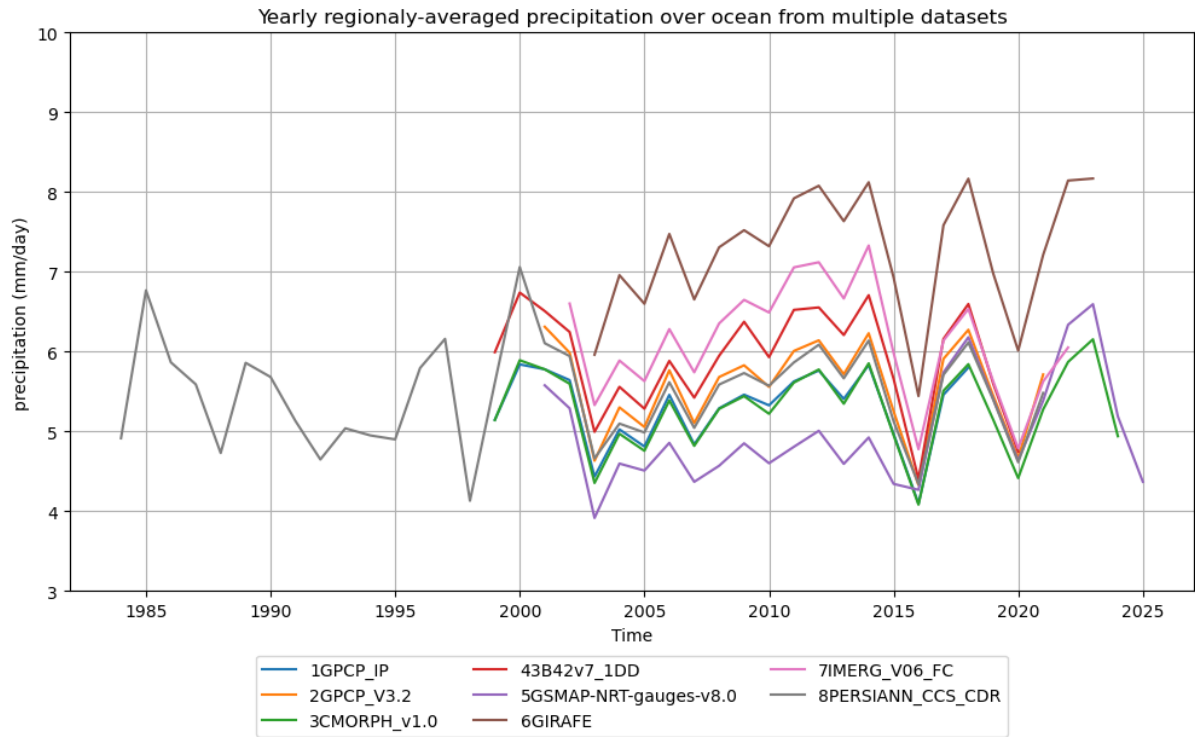

**Figure S1.** Time series of yearly regionally averaged oceanic precipitation (in mm/day) over Southeast Asia domain from multiple satellite precipitation products extracted from the Frequent Rainfall Observations on GridS (FROGs; Roca et al., 2019)

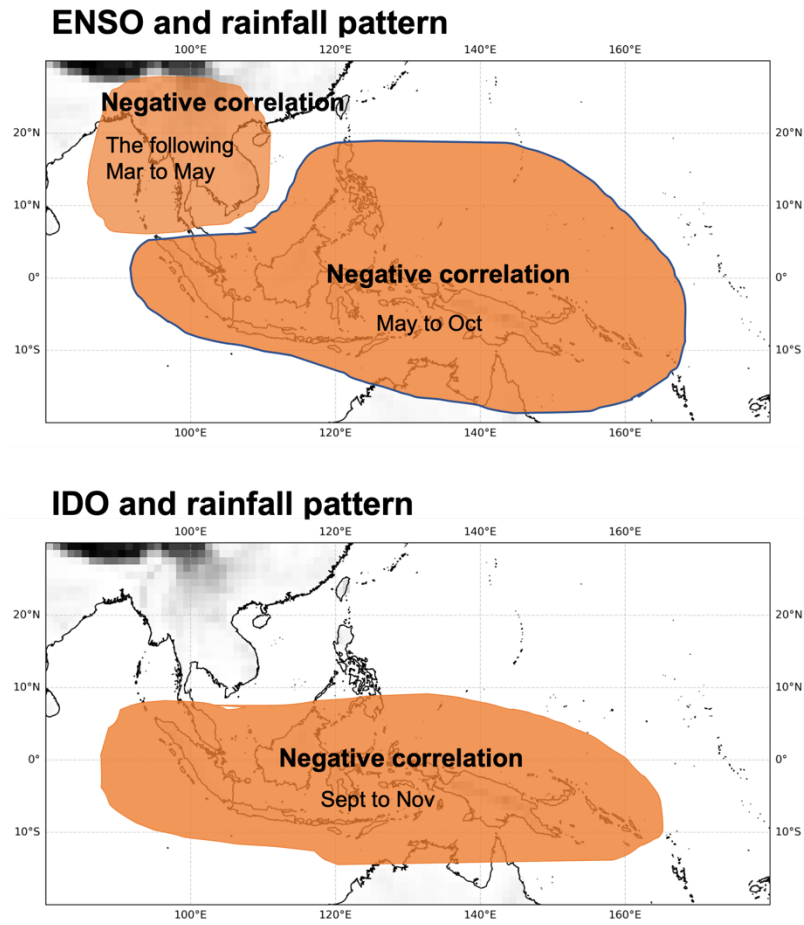

**Figure S2.** The schematic picture showing the impact of ENSO and IOD on the rainfall pattern over Southeast Asia. The correlation coefficients are calculated between DJF Nino3.4 or SON DMI indices and each regionally averaged precipitation anomalies during the corresponding marked period.

Average Total Monthly Rainfall (1951-2014)

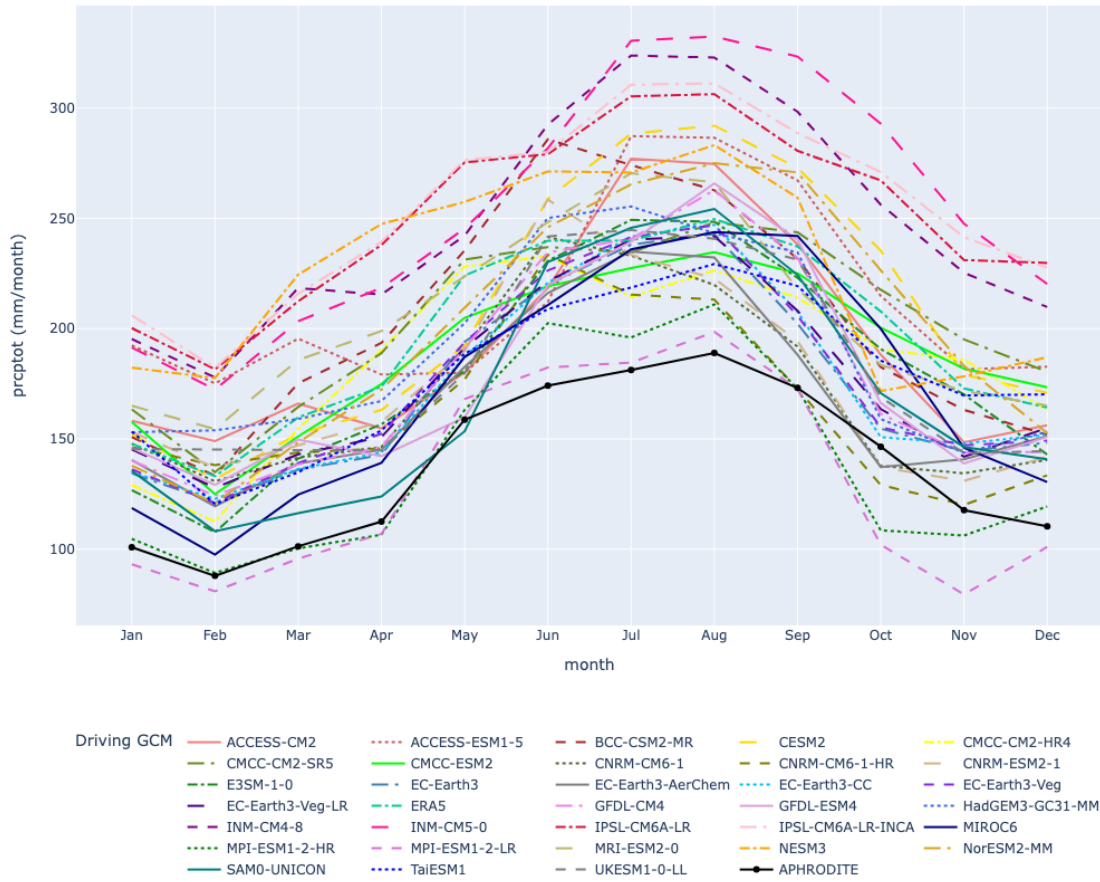

**Figure S3.** The climatological (1951-2014) regionally averaged total monthly rainfall (prcptot) over Southeast Asia. The APHRODITE data used as the benchmark is shown in black.

Annual Climatological Temperature Bias (1960-2014) (C degree/year)

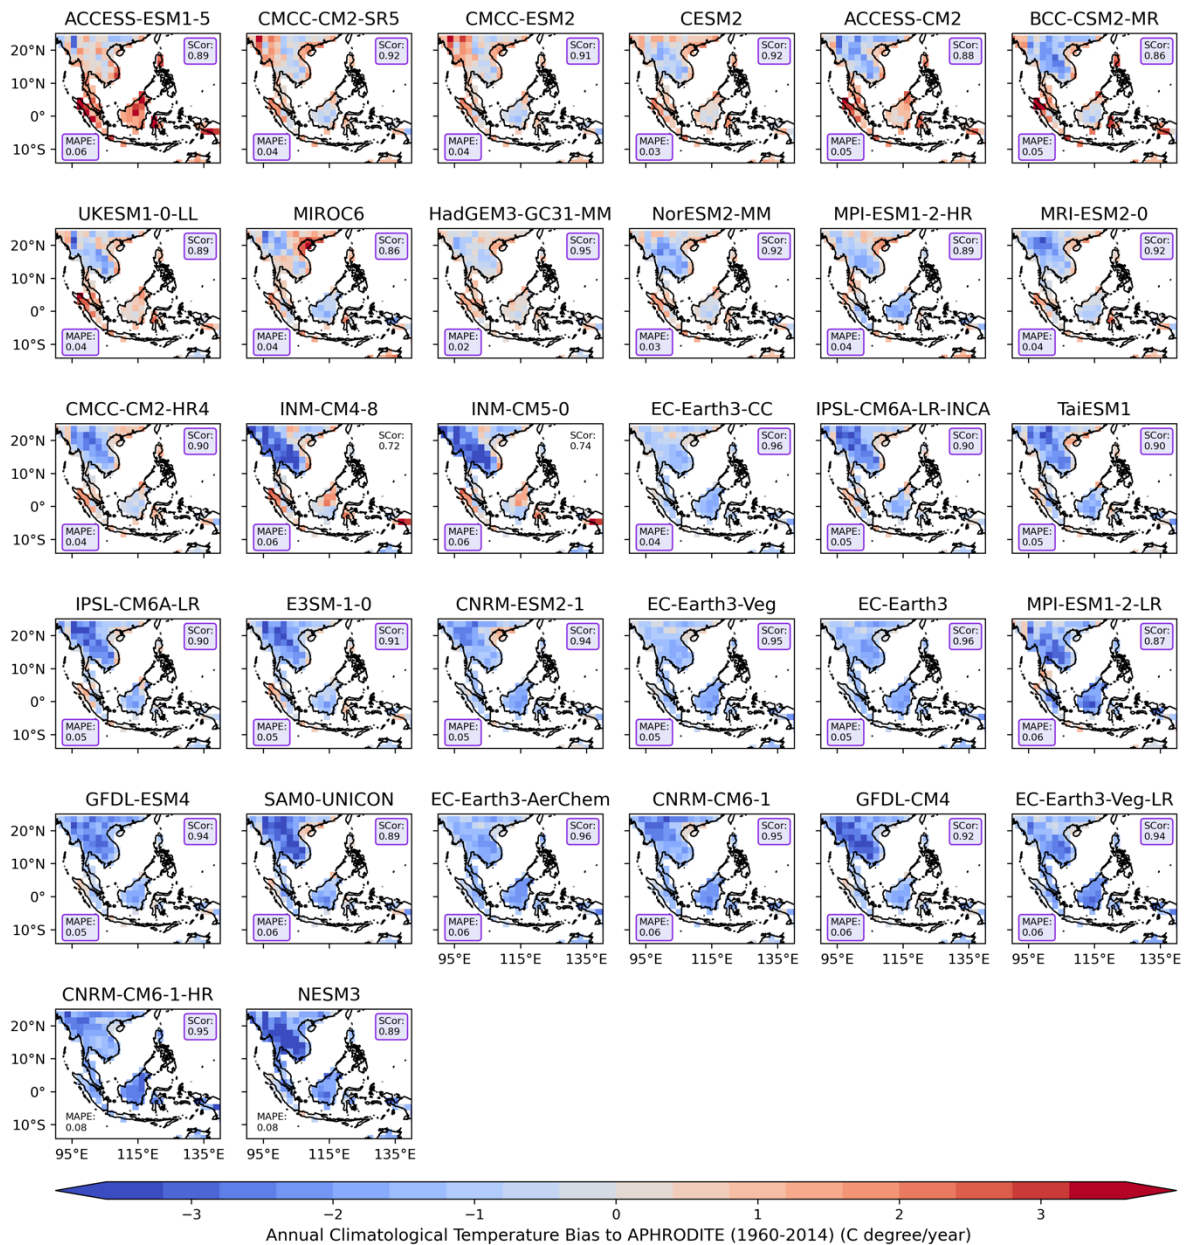

**Figure S4.** The annual climatological (1960-2014) bias of temperature (in C degree/year) for each model against the APHRODITE observational product, ranked hottest to coldest based on regionally-averaged of the bias. The mean absolute percentage error (MAPE) and spatial correlation (Scor) calculated against APHRODITE are plotted in the bottom left and upper right corners respectively. Values highlighted in purple-coloured boxes indicate values that meet our defined benchmarking thresholds (e.g., Scor  $\geq 0.85$  and MAPE  $\leq 0.06$ ) for this informed hypothetical. All analyses are considered at the coarsest CMIP6 GCM (i.e., NESM3,  $\sim 216\text{km}$ )

Average Monthly Temperature (1960-2014)

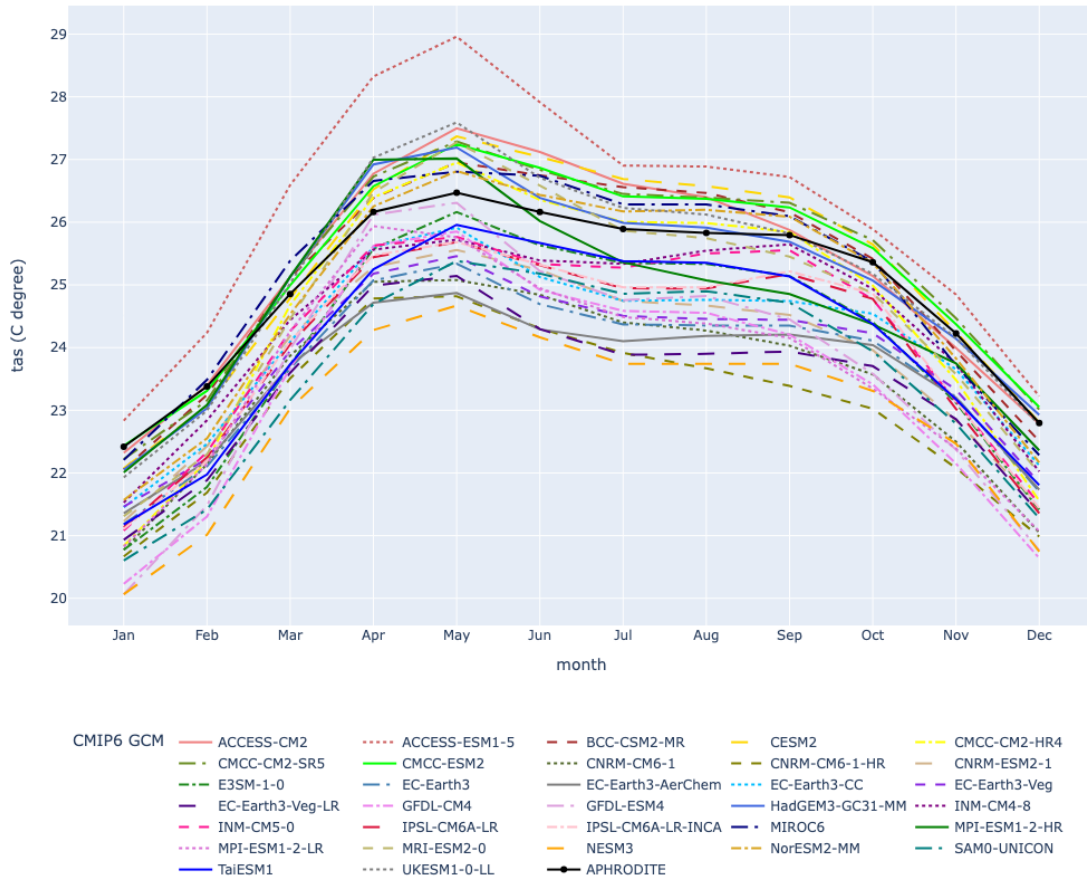

**Figure S5.** The climatological (1951-2014) regionally averaged monthly temperature (tas) over the mainland of Southeast Asia. The APHRODITE data used as the benchmark is shown in black.

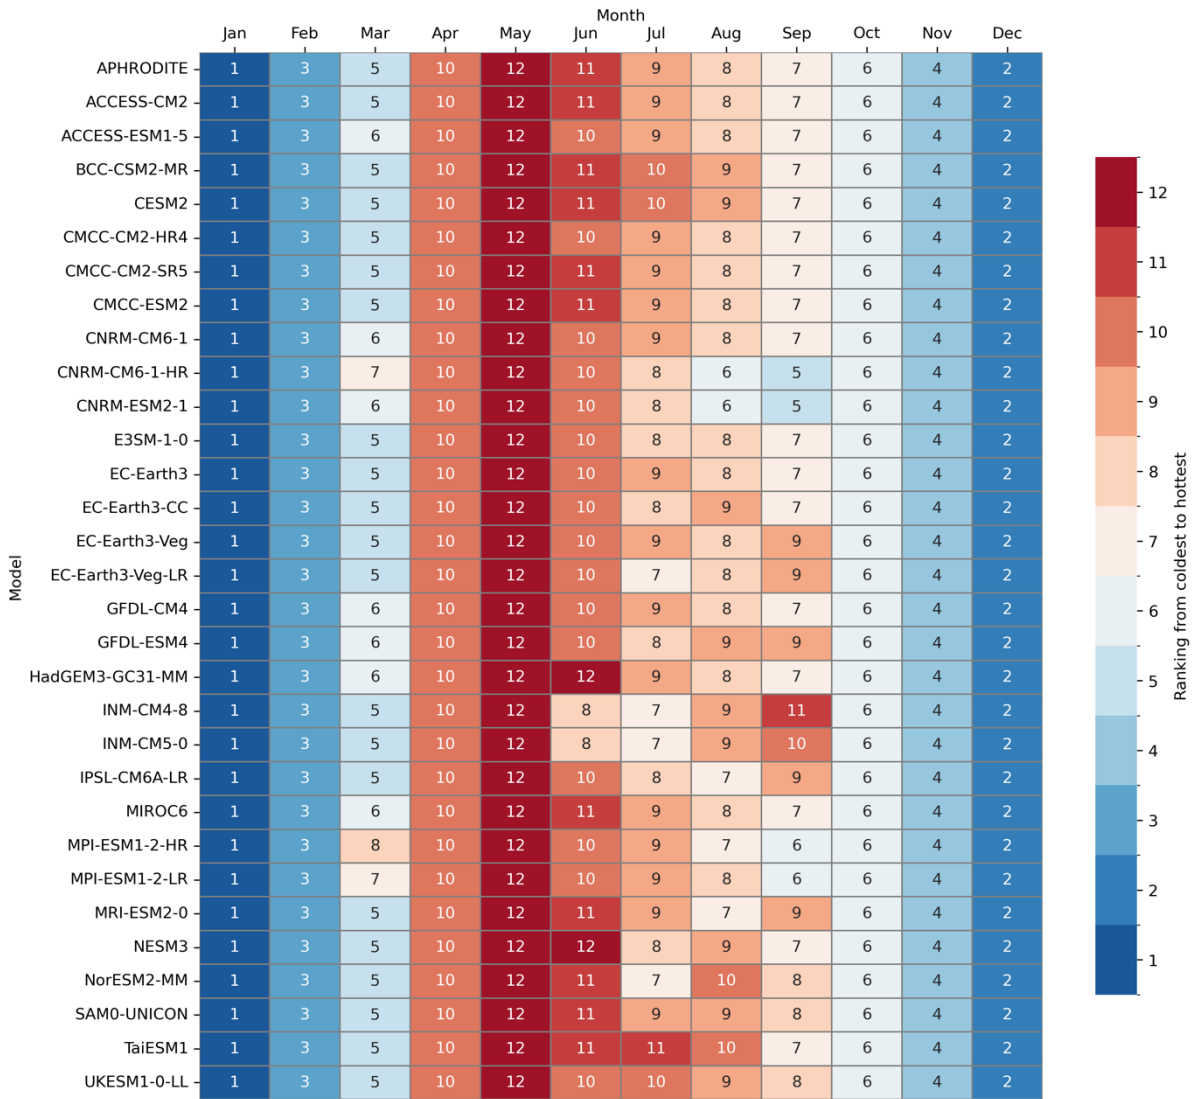

**Figure S6.** The climatological (1960-2014) monthly regionally averaged near-surface temperature over Southeast Asia are ranked from coldest to hottest for each CMIP6 simulation.

Annual Average Near-surface Temperature (1951-2014)

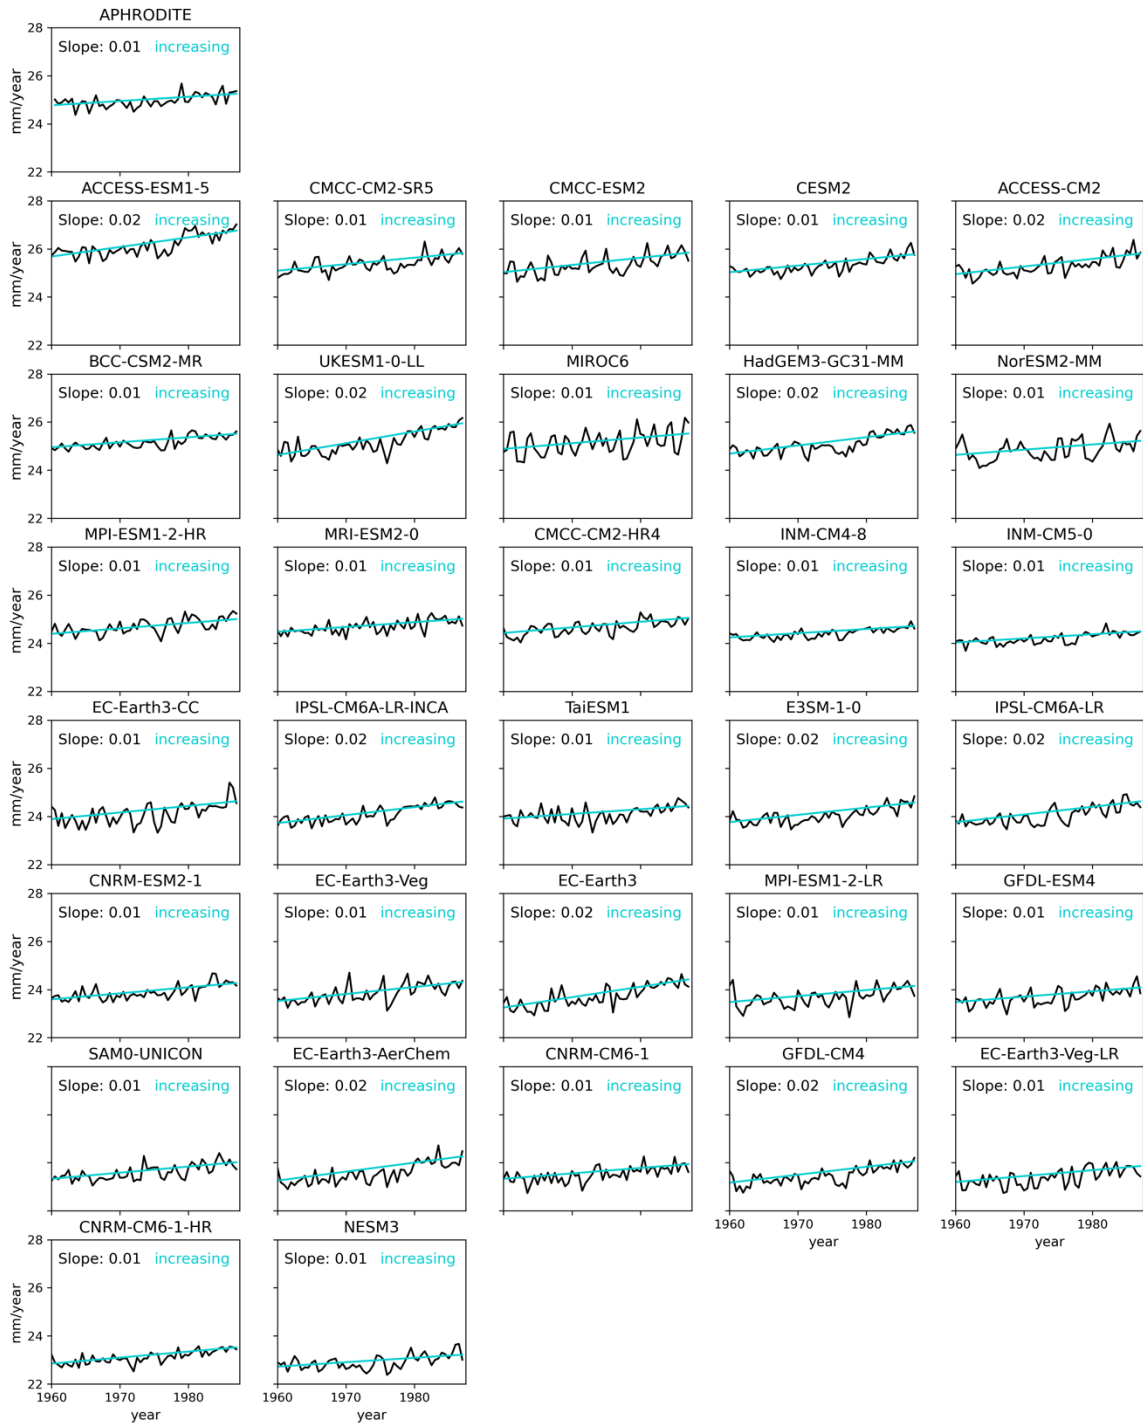

**Figure S7.** The observed (top row) and modelled annual average temperature across the land of Southeast Asia for the period 1960-2014. The direction of the observed Theil-Sen trend is the benchmark (top row). The Theil-Sen trend line for each of the simulations is plotted in grey if the models fail the benchmark and in purple if they pass. The magnitude of the trend is noted in the bottom left corner and the results of the Mann-Kendall significance test (Hussain et al., 2019) is noted in the bottom right corner. Models are sorted based on the magnitude of the spatial average to match the order of Figure S2. All models pass the benchmark.



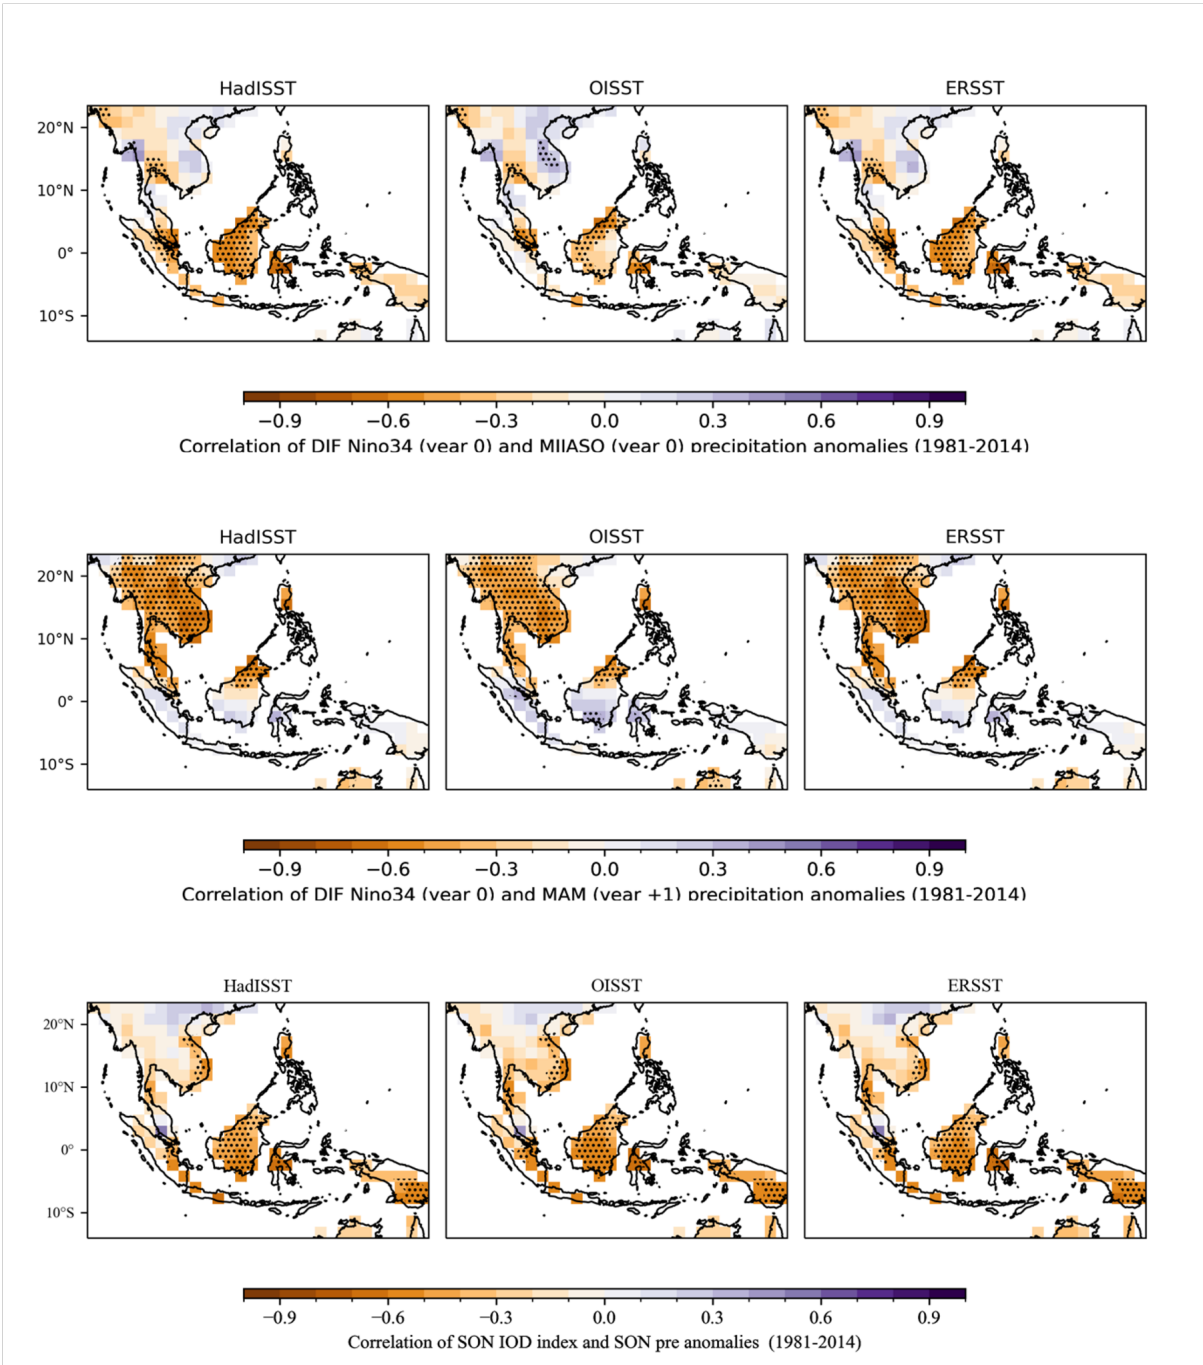

**Figure S8.** Teleconnection between observed precipitation and modes of variability with different SST datasets: HadISST, OISST and ERSST. The stippling indicates the grid points where the correlation coefficient is statistically significant at 95% confidence level according to the student t-test.

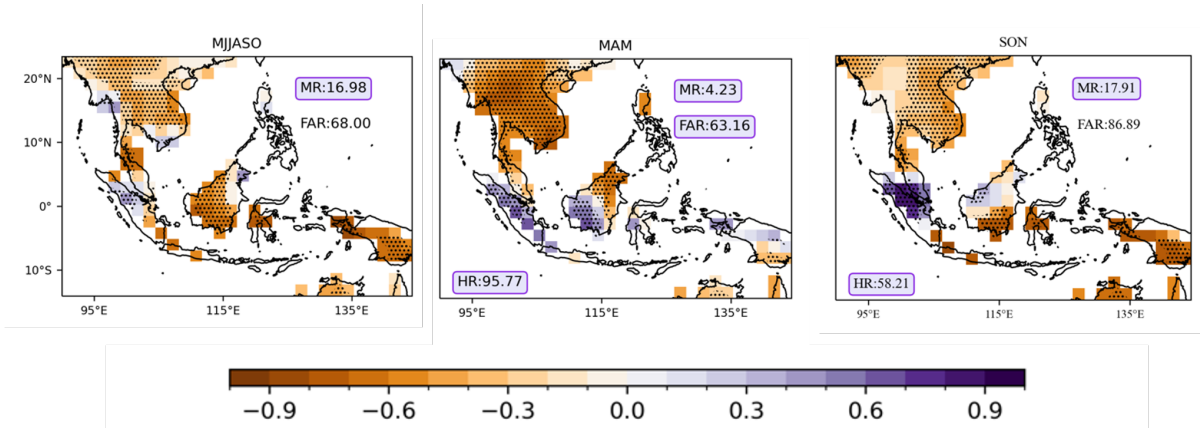

**Figure S9.** The teleconnection of precipitation and modes of variability in NorESM1-MM. The stippling indicates the grid points where the correlation coefficient is statistically significant at 95% confidence level according to the Student t-test. The Hite Rate (HR), Miss Rate (MR) and False Alarm Rate (FAR) calculated against ERA5 are plotted in the bottom left and upper right corners respectively. Values highlighted in purple-coloured boxes indicate values that meet our defined benchmarking thresholds for this informed hypothetical. All analyses are considered at the coarsest CMIP6 GCM (i.e., NESM3, ~ 216km).

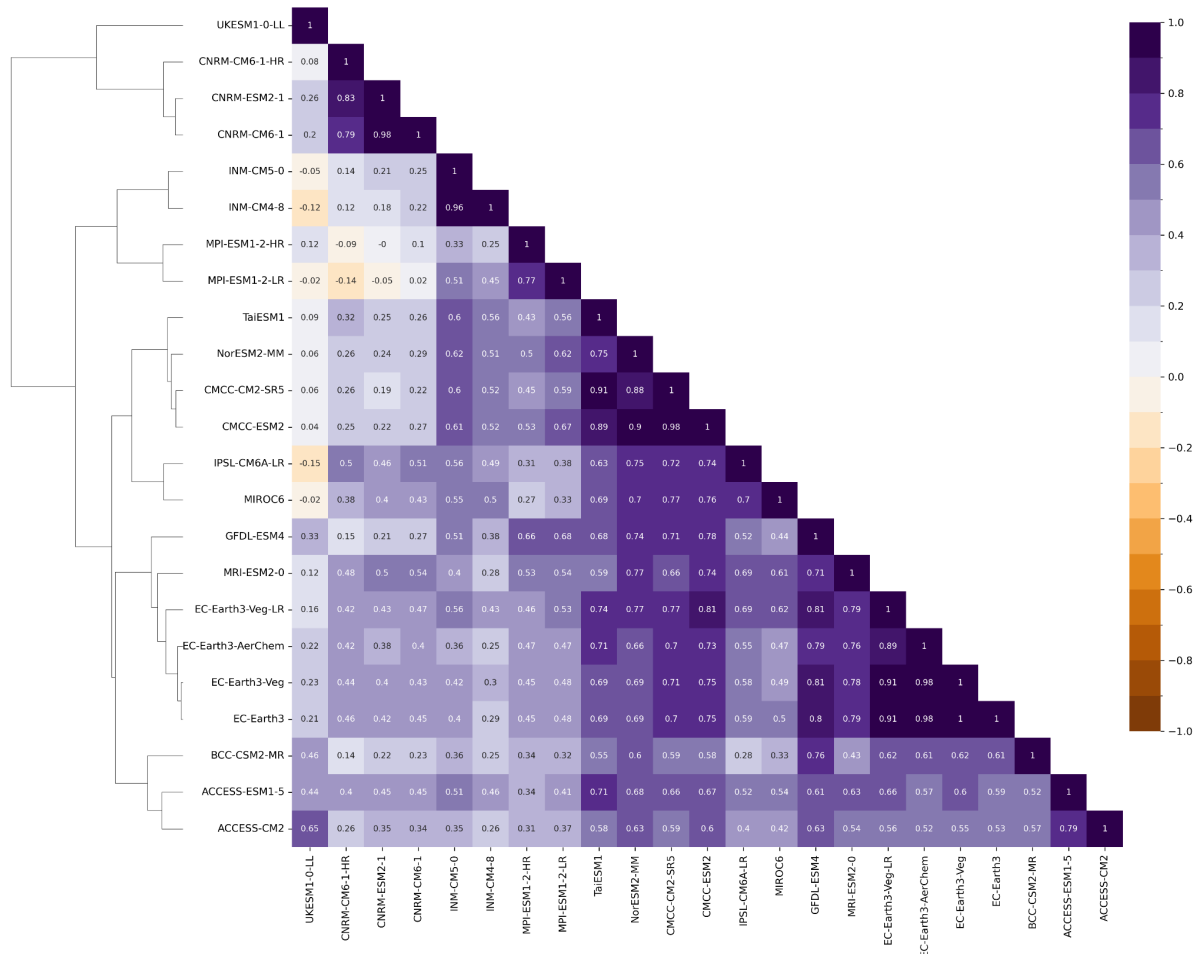

**Figure S10.** Dendrogram with hierarchical clustering applied for matrix of spatial correlation coefficient between CMIP6 climate models for the climatological (1951-2014) biases (relative to APHRODITE, Figure 2) in total precipitation during the wet season (MJJASO). The matrix is plotted for GCMs that simulated at least monthly tas (near-surface air temperature) and pr (precipitation) for the SSP-3.70 scenario only. Models are clustered with the Ward’s linkage criterion.

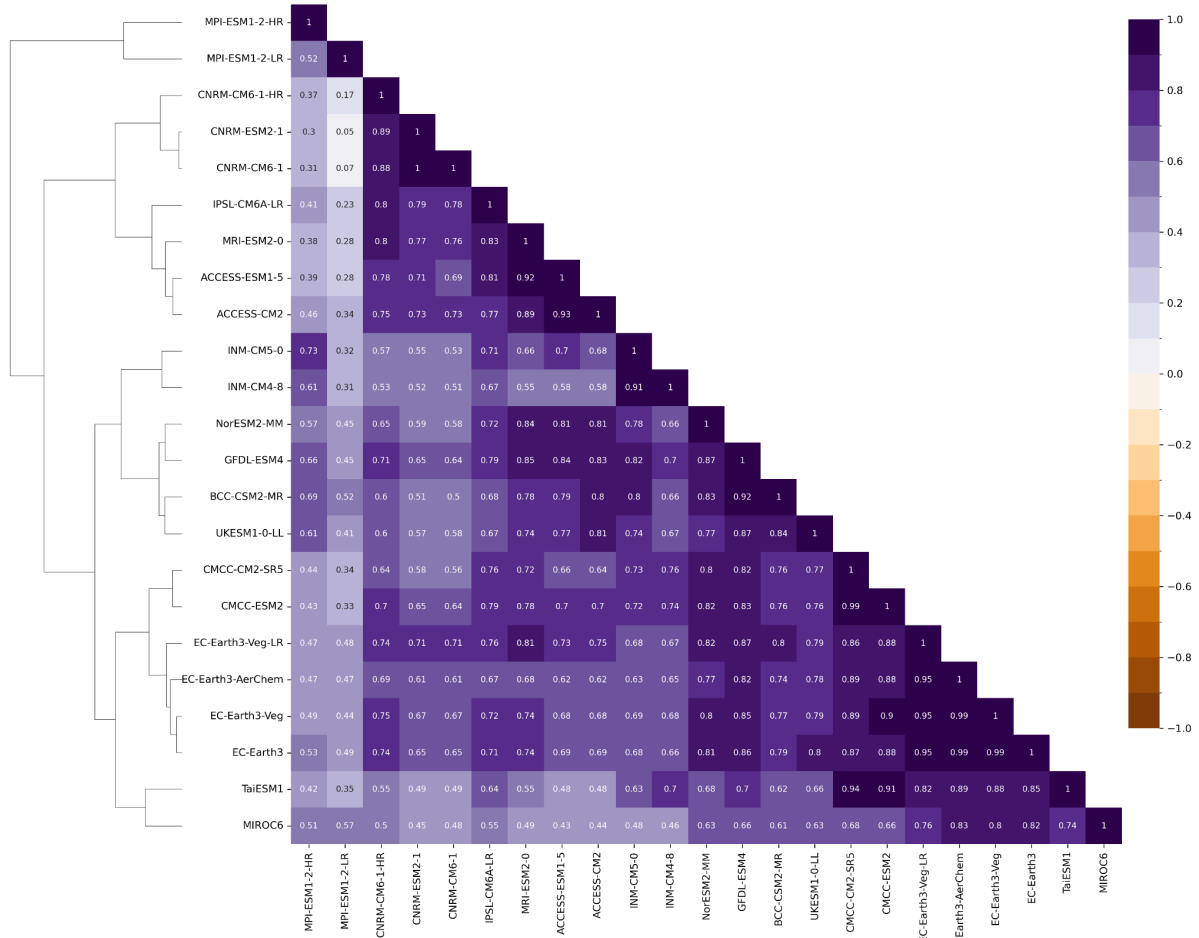

**Figure S11.** Similar to Figure S10 but for the dry season (November – April, NDJFMA).

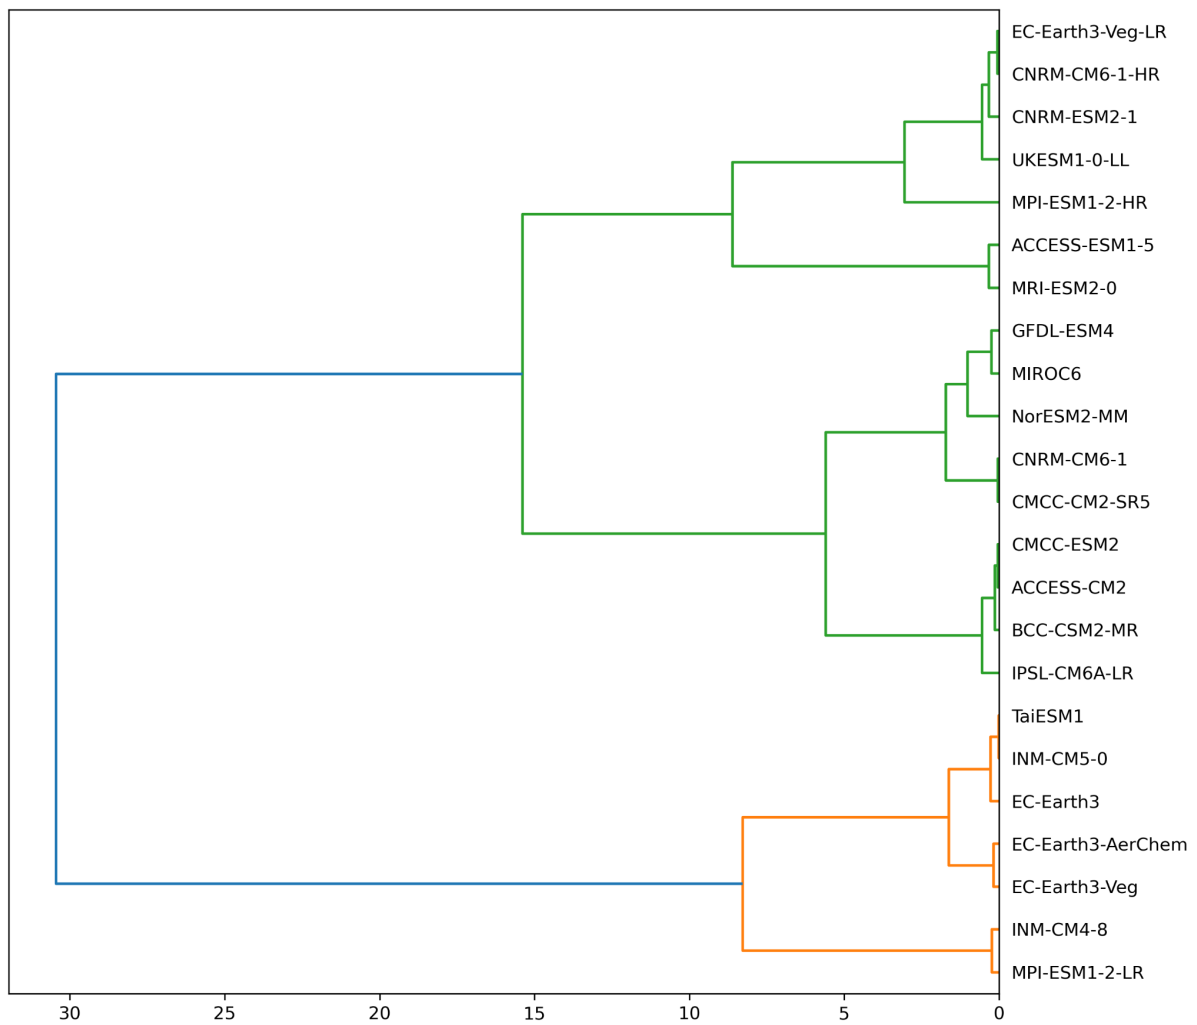

**Figure S12.** Dendrogram with hierarchical clustering of MJJASO regionally-averaged relative changes between the far-future (2070-2099) and the climatology (1961-1990) in seasonal total precipitation. Colours indicate the different clusters.

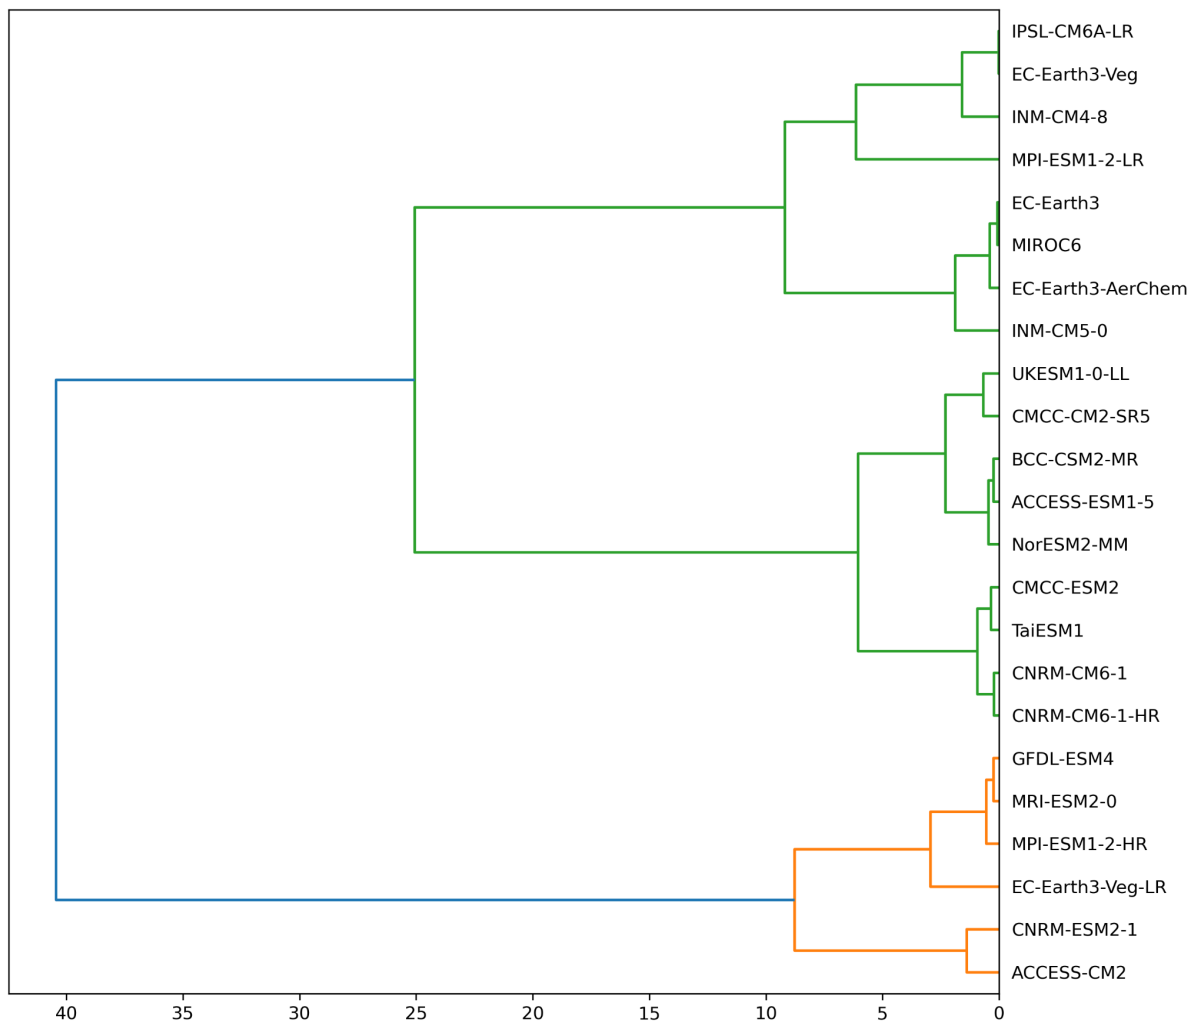

**Figure S13.** Similar to Figure S12 but for the dry season (November – April, NDJFMA).

**Table S1.** Summary of model performance against the MSMs for near-surface temperature. Models pass the benchmarks are highlighted in **bold**.

| Simulations              | MAPE | Scor | Seasonal cycle | Trend | Pass/4   |
|--------------------------|------|------|----------------|-------|----------|
| <b>ACCESS-CM2</b>        | +    | +    | +              | +     | <b>4</b> |
| <b>ACCESS-ESM1-5</b>     | +    | +    | +              | +     | <b>4</b> |
| <b>BCC-CSM2-MR</b>       | +    | +    | +              | +     | <b>4</b> |
| <b>CESM2</b>             | +    | +    | +              | +     | <b>4</b> |
| <b>CMCC-CM2-HR4</b>      | +    | +    | +              | +     | <b>4</b> |
| <b>CMCC-CM2-SR5</b>      | +    | +    | +              | +     | <b>4</b> |
| <b>CMCC-ESM2</b>         | +    | +    | +              | +     | <b>4</b> |
| <b>CNRM-CM6-1</b>        | +    | +    | +              | +     | <b>4</b> |
| CNRM-CM6-1-HR            | -    | +    | +              | +     | 3        |
| <b>CNRM-ESM2-1</b>       | +    | +    | +              | +     | <b>4</b> |
| <b>E3SM-1-0</b>          | +    | +    | +              | +     | <b>4</b> |
| <b>EC-Earth3-AerChem</b> | +    | +    | +              | +     | <b>4</b> |
| <b>EC-Earth3-CC</b>      | +    | +    | +              | +     | <b>4</b> |
| <b>EC-Earth3</b>         | +    | +    | +              | +     | <b>4</b> |
| <b>EC-Earth3-Veg</b>     | +    | +    | +              | +     | <b>4</b> |
| <b>EC-Earth3-Veg-LR</b>  | +    | +    | +              | +     | <b>4</b> |
| <b>GFDL-CM4</b>          | +    | +    | +              | +     | <b>4</b> |
| <b>GFDL-ESM4</b>         | +    | +    | +              | +     | <b>4</b> |
| <b>HadGEM3-GC31-MM</b>   | +    | +    | +              | +     | <b>4</b> |
| INM-CM4-8                | +    | -    | +              | +     | 3        |
| INM-CM5-0                | +    | -    | +              | +     | 3        |
| <b>IPSL-CM6A-LR</b>      | +    | +    | +              | +     | <b>4</b> |
| <b>IPSL-CM6A-LR-INCA</b> | +    | +    | +              | +     | <b>4</b> |
| <b>MIROC6</b>            | +    | +    | +              | +     | <b>4</b> |
| <b>MPI-ESM1-2-HR</b>     | +    | +    | +              | +     | <b>4</b> |
| <b>MPI-ESM1-2-LR</b>     | +    | +    | +              | +     | <b>4</b> |
| <b>MRI-ESM2-0</b>        | +    | +    | +              | +     | <b>4</b> |
| NESM3                    | -    | +    | +              | +     | 3        |
| <b>NorESM2-MM</b>        | +    | +    | +              | +     | <b>4</b> |
| <b>SAM0-UNICON</b>       | +    | +    | +              | +     | <b>4</b> |
| <b>TaiESM1</b>           | +    | +    | +              | +     | <b>4</b> |
| <b>UKESM1-0-LL</b>       | +    | +    | +              | +     | <b>4</b> |

**Table S2.** Summary of model performance against the MSMs using multiple observational references for precipitation. The BMF is conducted over the common period of 1982-2014 among various references. Models pass the benchmark are highlighted in **bold**.

| Simulations             | Pass/7    |           |          |          |
|-------------------------|-----------|-----------|----------|----------|
|                         | APHRODITE | REGEN_ALL | GPDD_FDD | CHIRPSv2 |
| <b>ACCESS-CM2</b>       | 7         | 7         | 7        | 7        |
| ACCESS-ESM1-5           | 6         | 6         | 6        | 6        |
| <b>BCC-CSM2-MR</b>      | 7         | 7         | 7        | 7        |
| <b>CESM2</b>            | 7         | 7         | 7        | 7        |
| <b>CMCC-CM2-HR4</b>     | 7         | 7         | 7        | 7        |
| <b>CMCC-CM2-SR5</b>     | 7         | 7         | 7        | 7        |
| <b>CMCC-ESM2</b>        | 7         | 7         | 7        | 7        |
| CNRM-CM6-1              | 6         | 6         | 6        | 6        |
| CNRM-CM6-1-HR           | 6         | 6         | 6        | 6        |
| CNRM-ESM2-1             | 6         | 6         | 6        | 6        |
| <b>E3SM-1-0</b>         | 7         | 7         | 7        | 7        |
| EC-Earth3-AerChem       | 6         | 6         | 6        | 6        |
| <b>EC-Earth3-CC</b>     | 7         | 7         | 7        | 7        |
| <b>EC-Earth3</b>        | 7         | 7         | 7        | 7        |
| <b>EC-Earth3-Veg</b>    | 7         | 7         | 7        | 7        |
| <b>EC-Earth3-Veg-LR</b> | 7         | 7         | 7        | 7        |
| <b>GFDL-CM4</b>         | 7         | 7         | 7        | 7        |
| <b>GFDL-ESM4</b>        | 7         | 7         | 7        | 7        |
| <b>HadGEM3-GC31-MM</b>  | 7         | 7         | 7        | 7        |
| INM-CM4-8               | 5         | 5         | 6        | 6        |
| INM-CM5-0               | 5         | 5         | 5        | 5        |
| IPSL-CM6A-LR            | 3         | 6         | 6        | 6        |
| IPSL-CM6A-LR-INCA       | 3         | 6         | 6        | 6        |
| <b>MIROC6</b>           | 7         | 7         | 7        | 7        |
| MPI-ESM1-2-HR           | 5         | 5         | 5        | 5        |
| MPI-ESM1-2-LR           | 7         | 7         | 6        | 7        |
| MRI-ESM2-0              | 6         | 6         | 6        | 6        |
| NESM3                   | 5         | 5         | 5        | 5        |
| NorESM2-MM              | 6         | 7         | 6        | 7        |
| <b>SAM0-UNICON</b>      | 7         | 7         | 7        | 7        |
| <b>TaiESM1</b>          | 7         | 7         | 7        | 7        |
| <b>UKESM1-0-LL</b>      | 7         | 7         | 7        | 7        |



**Table S3.** Summary of model performance against the versatility metrics using multiple SST products. The second tier of BMF is conducted over the common period of 1981-2014 among various references. Models pass the benchmark are highlighted in **bold**.

| Simulations            | Pass/15 |        |       |
|------------------------|---------|--------|-------|
|                        | HadISST | OI SST | ERSST |
| <b>ACCESS-CM2</b>      | 15      | 15     | 15    |
| BCC-CSM2-MR            | 13      | 12     | 13    |
| CESM2                  | 10      | 10     | 10    |
| CMCC-CM2-HR4           | 11      | 10     | 11    |
| CMCC-CM2-SR5           | 14      | 13     | 14    |
| CMCC-ESM2              | 14      | 14     | 14    |
| <b>E3SM-1-0</b>        | 15      | 15     | 15    |
| <b>EC-Earth3</b>       | 15      | 15     | 15    |
| <b>EC-Earth3-Veg</b>   | 15      | 15     | 15    |
| EC-Earth3-Veg-LR       | 14      | 13     | 14    |
| GFDL-CM4               | 14      | 13     | 14    |
| <b>GFDL-ESM4</b>       | 15      | 15     | 15    |
| <b>HadGEM3-GC31-MM</b> | 15      | 15     | 15    |
| MIROC6                 | 13      | 11     | 13    |
| MPI-ESM1-2-LR          | 14      | 13     | 14    |
| <b>SAM0-UNICON</b>     | 15      | 15     | 15    |
| TaiESM1                | 13      | 13     | 13    |
| <b>UKESM1-0-LL</b>     | 15      | 15     | 15    |

**Table S4.** Summary of model performance against the MSMs using APHRODITE as a reference. The benchmarking is conducted at the native grid of CMIP6 GCMs. Models fail instantly the benchmark are highlighted in red.

| Simulations             | Wet season |      | Dry season |      | Seasonal cycle | Trend |     | Pass/7 |
|-------------------------|------------|------|------------|------|----------------|-------|-----|--------|
|                         | MAPE       | Scor | MAPE       | Scor |                | Wet   | Dry |        |
| <b>ACCESS-CM2</b>       | +          | +    | +          | +    | +              | +     | +   | 7      |
| ACCESS-ESM1-5           | -          | +    | +          | +    | -              | +     | +   | 5      |
| BCC-CSM2-MR             | -          | +    | +          | +    | -              | +     | +   | 5      |
| <b>CESM2</b>            | +          | +    | +          | +    | +              | +     | +   | 7      |
| <b>CMCC-CM2-HR4</b>     | +          | +    | +          | +    | +              | +     | +   | 7      |
| <b>CMCC-CM2-SR5</b>     | +          | +    | +          | +    | +              | +     | +   | 7      |
| <b>CMCC-ESM2</b>        | +          | +    | +          | +    | +              | +     | +   | 7      |
| CNRM-CM6-1              | +          | +    | +          | +    | -              | +     | +   | 6      |
| CNRM-CM6-1-HR           | +          | +    | +          | +    | -              | +     | +   | 6      |
| CNRM-ESM2-1             | +          | +    | +          | -    | -              | +     | +   | 5      |
| <b>E3SM-1-0</b>         | +          | +    | +          | +    | +              | +     | +   | 7      |
| EC-Earth3-AerChem       | +          | +    | +          | +    | -              | +     | +   | 6      |
| EC-Earth3-CC            | +          | +    | +          | +    | -              | +     | +   | 6      |
| <b>EC-Earth3</b>        | +          | +    | +          | +    | +              | +     | +   | 7      |
| <b>EC-Earth3-Veg</b>    | +          | +    | +          | +    | +              | +     | +   | 7      |
| <b>EC-Earth3-Veg-LR</b> | +          | +    | +          | +    | +              | +     | +   | 7      |
| <b>GFDL-CM4</b>         | +          | +    | +          | +    | +              | +     | +   | 7      |
| <b>GFDL-ESM4</b>        | +          | +    | +          | +    | +              | +     | +   | 7      |
| <b>HadGEM3-GC31-MM</b>  | +          | +    | +          | +    | +              | +     | +   | 7      |
| INM-CM4-8               | -          | +    | -          | +    | -              | +     | +   | 4      |
| INM-CM5-0               | -          | +    | -          | +    | +              | +     | +   | 5      |
| IPSL-CM6A-LR            | -          | -    | -          | -    | +              | +     | +   | 3      |
| IPSL-CM6A-LR-INCA       | -          | -    | -          | -    | -              | +     | +   | 2      |
| <b>MIROC6</b>           | +          | +    | +          | +    | +              | +     | +   | 7      |
| MPI-ESM1-2-HR           | +          | +    | +          | +    | +              | +     | -   | 6      |
| MPI-ESM1-2-LR           | +          | +    | +          | +    | +              | +     | +   | 7      |
| MRI-ESM2-0              | +          | -    | +          | +    | +              | +     | -   | 5      |
| NESM3                   | +          | +    | +          | -    | -              | +     | +   | 5      |
| NorESM2-MM              | -          | +    | +          | +    | +              | +     | +   | 6      |
| <b>SAM0-UNICON</b>      | +          | +    | +          | +    | +              | +     | +   | 7      |
| <b>TaiESM1</b>          | +          | +    | +          | +    | +              | +     | +   | 7      |
| <b>UKESM1-0-LL</b>      | +          | +    | +          | +    | +              | +     | +   | 7      |
